# Supplementary material for: Probabilistic Protein Function Prediction from Heterogeneous Genome-Wide Data
Source: PLoS One. 2007 Mar 28;2(3):e337. doi: 10.1371/journal.pone.0000337 (PMC1828618; doi:10.1371/journal.pone.0000337)
Supplement: Table S2 — Improved GO terms by adding protein motif data at 50% precision. (0.02 MB XLS) [file pone.0000337.s002.xls]

## Sheet: 2
GO term	#TP before	#FP before	#TP after	#FP after
DNA transposition	0	0	33	33
protein amino acid phosphorylation	0	0	12	12
tRNA aminoacylation for protein translation	0	0	10	10
phosphorylation	2	2	91	91
phosphate metabolism	24	24	102	102
phosphorus metabolism	24	24	102	102
DNA recombination	17	17	68	68
Ty element transposition	15	15	28	28
regulation of transcription from RNA polymerase II promoter	67	67	86	86
transcription from RNA polymerase II promoter	160	152	176	176
