# Supplementary material for: Probabilistic Protein Function Prediction from Heterogeneous Genome-Wide Data
Source: PLoS One. 2007 Mar 28;2(3):e337. doi: 10.1371/journal.pone.0000337 (PMC1828618; doi:10.1371/journal.pone.0000337)
Supplement: Table S4 — Improved GO terms by adding localization data at 50% precision. (0.02 MB XLS) [file pone.0000337.s004.xls]

## Sheet: 4
GO term	#TP before	#FP before	#TP after	#FP after
phosphorylation	2	2	37	37
ion transport	3	3	22	22
generation of precursor metabolites and energy	25	25	56	56
phosphate metabolism	24	24	39	39
phosphorus metabolism	24	24	39	39
cofactor metabolism	18	18	28	28
microtubule-based process	50	49	64	63
mitosis	43	43	55	55
M phase of mitotic cell cycle	44	44	56	56
establishment and/or maintenance of cell polarity (sensu Fungi)	51	50	63	63
establishment and/or maintenance of cell polarity	51	50	63	63
cytoskeleton organization and biogenesis	116	116	140	134
mitotic cell cycle	88	88	105	105
secretion	128	128	147	147
morphogenesis	99	99	110	109
cellular morphogenesis	99	99	110	109
vesicle-mediated transport	182	182	202	199
establishment of protein localization	102	102	113	113
secretory pathway	132	131	145	145
Golgi vesicle transport	103	103	113	113
rRNA processing	124	124	134	134
ribosome biogenesis	150	149	162	161
